# Supplementary material
Source: publisher figshare collection journal article supplement (https://tandf.figshare.com/articles/dataset/_/25909456)
Supplement: Supplementary file 1 [file 1]

**SUPPLEMENTARY FILE**

**Title:**

Nano-TiO2 Enhanced Fruit Storage Chambers: Unveiling the Potential for Prolonging Banana Shelf Life

**Authors:**

Putri Ardhya Anindita, Putri Adiela Agson-Gani, Fairuz Gianirfan Nugroho, Rizkita Rachmi Esyanti, Veinardi Suendo, Fenny Martha Dwivany

Description:

Results of correlation analysis (Pearson method) of red, green, L*, and b* values on each treatment (FS, FT, and FM)

**Supplementary Table 1.** Correlation analysis result of color values in FS treatment

|  | Red | Green | L* | b* |
| --- | --- | --- | --- | --- |
| Red | 1.0000 |  |  |  |
| Green | 0.4946 | 1.0000 |  |  |
| L* | 0.7647 | **0.9383** | 1.0000 |  |
| b* | 0.8024 | 0.88611 | **0.9574** | 1.0000 |
| *Values in bold are considered high correlation value (>0.9)* | | | | |


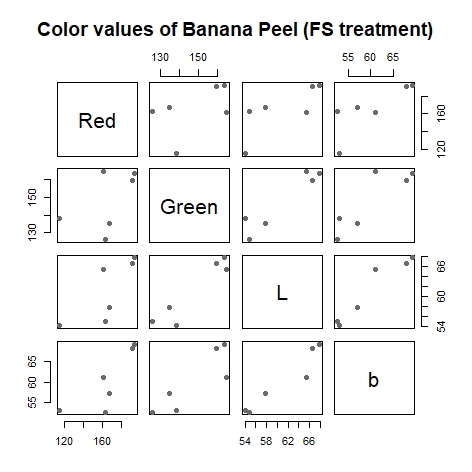


**Supplementary Figure 1.** Correlation matrix of color valus in FS treatment

**Supplementary Table 2.** Correlation analysis result of color values in FT treatment

|  | Red | Green | L* | b* |
| --- | --- | --- | --- | --- |
| Red | 1.0000 |  |  |  |
| Green | 0.5483 | 1.0000 |  |  |
| L* | 0.8639 | 0.8927 | 1.0000 |  |
| b* | **0.9213** | 0.8281 | **0.9881** | 1.0000 |
| *Values in bold are considered high correlation value (>0.9)* | | | | |


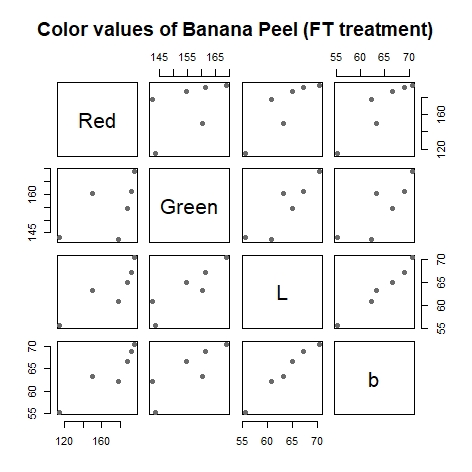


**Supplementary Figure 2.** Correlation matrix of color valus in FT treatment

**Supplementary Table 3**. Correlation analysis result of color values in FM treatment

|  | Red | Green | L* | b* |
| --- | --- | --- | --- | --- |
| Red | 1.0000 |  |  |  |
| Green | 0.4441 | 1.0000 |  |  |
| L* | 0.7272 | **0.9367** | 1.0000 |  |
| b* | 0.8711 | 0.8224 | **0.9651** | 1.0000 |
| *Values in bold are considered high correlation value (>0.9)* | | | | |


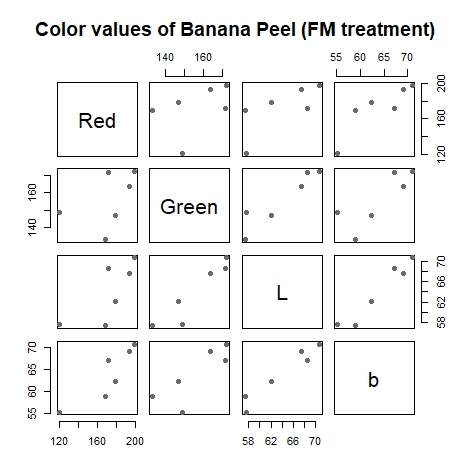


**Supplementary Figure 3.** Correlation matrix of color valus in FS treatment
